1  
2  
3  
4  
5  
6  
7  
8  
9  
10  
11  
12  
13  
14

## **Title: The *Silene latifolia* genome and its giant Y chromosome**

**Authors:** Carol Moraga<sup>1,2,3,4†</sup>, Catarina Branco<sup>1,5,6,7†</sup>, Quentin Rougemont<sup>8†</sup>, Paris Veltsos<sup>9</sup>, Pavel Jedlička<sup>10</sup>, Aline Muyle<sup>11</sup>, Melissa Hanique<sup>12</sup>, Eric Tannier<sup>1</sup>, Xiaodong Liu<sup>13</sup>, Eddy Mendoza-Galindo<sup>11</sup>, Claire Lemaitre<sup>14</sup>, Peter D. Fields<sup>15</sup>, Corinne Cruaud<sup>16</sup>, Karine Labadie<sup>16</sup>, Caroline Belser<sup>16</sup>, Jerome Briolay<sup>17</sup>, Sylvain Santoni<sup>18</sup>, Radim Cegan<sup>10</sup>, Raquel Linheiro<sup>1,5,6,7</sup>, Ricardo C. Rodríguez de la Vega<sup>8</sup>, Gabriele Adam<sup>12</sup>, Adil El Filali<sup>1</sup>, Vinciane Mossion<sup>19</sup>, Adnane Boualem<sup>12</sup>, Raquel Tavares<sup>5,6,7</sup>, Amine Chebbi<sup>20</sup>, Richard Cordaux<sup>21</sup>, Cécile Fruchard<sup>1</sup>, Djivan Prentout<sup>22</sup>, Amandine Velt<sup>23</sup>, Bruno Spataro<sup>1</sup>, Stephane Delmotte<sup>1</sup>, Laura Weingartner<sup>24</sup>, Helena Toegelová<sup>25</sup>, Zuzana Tulpová<sup>25</sup>, Petr Cápál<sup>25</sup>, Hana Šimková<sup>25</sup>, Helena Štorchová<sup>26</sup>, Manuela Krüger<sup>26</sup>, Oushadee A. J. Abeyawardana<sup>26</sup>, Douglas R. Taylor<sup>27</sup>, Matthew S. Olson<sup>28</sup>, Daniel B. Sloan<sup>15</sup>, Sophie Karrenberg<sup>29</sup>, Lynda F. Delph<sup>30</sup>, Deborah Charlesworth<sup>31</sup>, Tatiana Giraud<sup>8</sup>, Abdelhafid Bendahmane<sup>12</sup>, Alex Di Genova<sup>2,3,4</sup>, Amin Madoui<sup>16,32</sup>, Roman Hobza<sup>10</sup>, Gabriel A. B. Marais<sup>1,5,6,7\*</sup>

### **Affiliations:**

1. Laboratoire Biométrie et Biologie Evolutive (LBBE), CNRS / Univ. Lyon 1, Campus de la Doua, Villeurbanne, France.
2. Instituto de Ciencias de la Ingeniería, Universidad de O'Higgins, Rancagua, Chile.
3. Centro UOH de Bioingeniería (CUBI), Universidad de O'Higgins, Rancagua, Chile.
4. Millennium Institute for Integrative Biology iBio, Chile.
5. CIBIO, Centro de Investigação em Biodiversidade e Recursos Genéticos, InBIO, Laboratório Associado, Campus de Vairão, Universidade do Porto, 4485-661 Vairão, Portugal.
6. Departamento de Biologia, Faculdade de Ciências, Universidade do Porto, 4099-002, Porto, Portugal.
7. BIOPOLIS Program in Genomics, Biodiversity and Land Planning, CIBIO, Campus de Vairão, 4485-661 Vairão, Portugal.
8. Université Paris-Saclay, CNRS, AgroParisTech, Laboratoire Ecologie Systématique et Evolution, UMR 8079, Bâtiment 680, 12 route RD128, 91190 Gif-sur-Yvette, France.
9. Department of Biology, Vrije Universiteit Brussel, Pleinlaan 2, 1050 Brussels, Belgium.
10. Department of Plant Developmental Genetics, Institute of Biophysics of the Czech Academy of Sciences, Kralovopolska 135, 61200, Brno, Czech Republic.
11. Centre d'Ecologie Fonctionnelle et Evolutive (CEFE), University of Montpellier, CNRS, EPHE, IRD, Montpellier, France.
12. Institute of Plant Sciences Paris-Saclay (IPS2), Université Paris-Saclay, CNRS, INRAE, Université d'Evry, Gif-sur-Yvette, France.
13. Department of Biology, University of Copenhagen, Ole Maaløes Vej 5, DK-2200 Copenhagen, Denmark.

- 1 14. Institut de recherche en informatique et systèmes aléatoires (IRISA), Univ. Rennes, Inria,  
2 CNRS, Rennes F-35000, France.
- 3 15. Department of Biology, Colorado State University, Fort Collins, CO, USA.
- 4 16. Genoscope, Institut François Jacob, CEA, CNRS, Univ Evry, Université Paris-Saclay,  
5 Evry, France.
- 6 17. Développement de Techniques et Analyse Moléculaire de la Biodiversité (DTAMB),  
7 Univ. Lyon 1, Campus de la Doua, Villeurbanne, France.
- 8 18. Genomic platform, Amélioration génétique et adaptation des plantes méditerranéennes et  
9 tropicales (AGAP), Univ. Montpellier, CIRAD, INRAE, Montpellier, France.
- 10 19. Department of Ecology and Genetics, Division of plant ecology and evolution, Uppsala  
11 University, Norbyvägen 18D, SE-75236 Uppsala, Sweden.
- 12 20. Efor, Grosspeter Tower (Spaces), Grosspeteranlage 29, 4052 Basel, Switzerland.
- 13 21. Évolution Génomes Comportement Écologie, Université Paris-Saclay, CNRS, IRD, Gif-  
14 sur-Yvette, France.
- 15 22. Department of Biological Sciences, Columbia University, New York, USA.
- 16 23. Santé de la Vigne et Qualité du Vin (SVQV), INRAE, Colmar, France.
- 17 24. University of Louisville School of Medicine, Undergraduate Medical Education, 500  
18 South Preston Street, Louisville, KY, 40202, USA.
- 19 25. Institute of Experimental Botany of the Czech Academy of Sciences, Olomouc, Czech  
20 Republic.
- 21 26. Plant Reproduction Lab, Institute of Experimental Botany, Czech Academy of Sciences,  
22 Rozvojová 263, Prague, 16502 Czech Republic.
- 23 27. Department of Biology, University of Virginia, Charlottesville, VA, USA.
- 24 28. Department of Biological Sciences, Texas Tech University, Lubbock, TX, USA.
- 25 29. Department of Ecology and Genetics, Division of Plant ecology and evolution, Uppsala  
26 University, Norbyvägen 18D, SE-75236 Uppsala, Sweden.
- 27 30. Department of Biology, Indiana University, Bloomington, IN 47405 USA.
- 28 31. Institute of Ecology and Evolution, School of Biological Sciences, University of  
29 Edinburgh, Ashworth Laboratories, Charlotte Auerbach Road Edinburgh EH9 3FL, UK.
- 30 32. Service d'Etude des Prions et des Infections Atypiques (SEPIA), Institut François Jacob,  
31 Commissariat à l'Énergie Atomique et aux Énergies Alternatives (CEA), Université Paris  
32 Saclay, Fontenay-aux-Roses, France.

33 †These authors contributed equally to this work

34 \*Corresponding author. Email: [gmarais@cibio.up.pt](mailto:gmarais@cibio.up.pt)

35  
36

1 **Abstract:** In some species, the Y is a tiny chromosome but the dioecious plant *Silene latifolia*  
2 has a giant ~550 Mb Y chromosome, which has remained unsequenced so far. Here we used a  
3 hybrid approach to obtain a high-quality male *S. latifolia* genome. Using mutants for sexual  
4 phenotype, we identified candidate sex-determining genes on the Y. Comparative analysis of the  
5 sex chromosomes with outgroups showed the Y is surprisingly rearranged and degenerated for a  
6 ~11 MY-old system. Recombination suppression between X and Y extended in a stepwise  
7 process, and triggered a massive accumulation of repeats on the Y, as well as in the non-  
8 recombining pericentromeric region of the X, leading to giant sex chromosomes.

9

10 **One-Sentence Summary:** This work uncovers the structure, function, and evolution of one of  
11 the largest giant Y chromosomes, that of the model plant *Silene latifolia*, which is almost 10  
12 times larger than the human Y, despite similar genome sizes.

13

## 1 Main Text:

2 Among the multiple paths the evolution of sex chromosomes can take, some lead to giant Y  
3 chromosomes (1,2). Giant Y chromosomes have been first identified in dioecious plant  
4 species (3) but also exist in animals (4). In the last decade, great advances have been made in  
5 studying plant sex chromosomes thanks to genomics and bioinformatics (5,6), but no giant  
6 plant Y chromosome has been assembled yet. Giant Y chromosomes may result from  
7 massive accumulation of transposable elements (TEs) but their chromosome organization,  
8 their precise role in sex determination, and their evolution remain poorly known (3).

9 *Silene latifolia* (Caryophyllaceae) is a dioecious plant that has been studied since Darwin's  
10 time (7). *S. latifolia* has an XY sex-determination system, which was discovered 100 years  
11 ago (8). The Y is ~550 Mb, and the X ~400 Mb, of the total haploid genome size of ~2.7 Gb  
12 (9). Genetic maps show that the X and the Y are largely non-recombining and share only a  
13 single pseudo-autosomal region (PAR) (10). Recombination has been suppressed  
14 progressively forming groups of X/Y gene pairs with differing synonymous divergence,  
15 called evolutionary strata (11,12). The repeat-richness (13) and size of the *S. latifolia* Y have,  
16 however, so far prevented its assembly. Mutants with deletions on the Y chromosome and  
17 altered sex phenotypes indicate the presence of three sex-determining regions (14): one  
18 female-suppressing region (carrying a gynoeceium-suppressing factor, GSF) and two male-  
19 promoting (carrying a stamen-promoting factor - SPF and male-fertility factor - MFF) (15). A  
20 GSF candidate gene has recently been proposed (16), but the other sex-determining genes  
21 remain unknown.

22 Here we used an Oxford-Nanopore-Technology (ONT)-based sequencing approach to obtain  
23 the *S. latifolia* genome, in order to study the repeat-rich Y chromosome. We also used high-  
24 quality genome assemblies of closely related non-dioecious *Silene* species as outgroups to  
25 make inferences about the evolution of the *S. latifolia* sex chromosomes. We sequenced  
26 mutants with Y deletions for three sexual phenotypes (hermaphrodites and asexuals with  
27 early/intermediate and late anther development arrest) in order to pinpoint candidate sex-  
28 determining genes/regions. Furthermore, we generated expression data at two critical stages  
29 for male and female flower development to help identify sex-determining genes.

30

## 31 The structure and gene content of the sex chromosomes

32 To assemble the complex *S. latifolia* genome, we produced an inbred population from 17  
33 generations of brother-sister crosses to reduce heterozygosity (see Material and Methods for  
34 the details of the sequencing, assembly and annotation methodologies). We selected one male  
35 and one female individual from this inbred population for sequencing. The male was  
36 sequenced using ONT at 100X coverage to ensure 50X coverage for both sex chromosomes  
37 (Table S1). Assembly was performed using an initial hybrid long-read approach including  
38 Flye (Figure S1). The ONT contigs were polished using 200X of short Illumina reads and  
39 then scaffolded using Bionano optical mapping data followed by Omni-C contact data (see  
40 Table 1 for genome statistics and Table S2 for more details). The polished consensus  
41 sequence reached a phred quality score of ~30 (1/1000 base error). All scaffolds were  
42 anchored onto our genetic map, except scaffolds 1, 12, 13, 16 and 41 (Figure S2). These  
43 unplaced scaffolds were classified as likely fragments of the Y chromosome based on  
44 female/male sequence depths and mapping of previously well-characterized sex-linked genes  
45 (see below). They were assembled into a single sequence. Re-mapping the Omni-C data onto

1 the chromosome sequences obtained in this manner further improved the scaffolding of the X  
2 and Y chromosomes. The final chromosome sequences show high consistency with the  
3 contact data (Figure S3). During the assembly process, the two haplotypes of each sequenced  
4 region were collapsed into a single sequence. We present this a haploid version of the *S.*  
5 *latifolia* genome with a single pseudomolecule for each chromosome, including separate  
6 assemblies of X and the Y chromosomes, except for the PARs on the X and Y, which were  
7 also collapsed (the resulting single PAR sequence is assembled on the X chromosome only  
8 (see below). The sizes of the genome and sex chromosomes obtained closely match the  
9 previous C-value-based size estimates (Table 1). Gene annotation identified 35,436 protein-  
10 coding genes. BUSCO scores were high at different steps of the assembly/annotation process  
11 and the final score was 86.5% (Tables 1 and S2). Repeat analysis revealed that 79.24% of the  
12 *S. latifolia* male genome consists of repeats (Table S3). Annotated repeats represented  
13 61.18% of the *S. latifolia* genome with a very high abundance of two LTR retrotransposons  
14 *Copia* (20.73%) and *Gypsy* (33.69%). Telomere-associated repeats were found at the  
15 expected locations for all chromosome sequences, which constitute telomere-to-telomere  
16 assemblies (Figure 1A). Genes are concentrated in the chromosomal arms and are sparse in  
17 the pericentromeric regions, and vice versa for repeats, as in many eukaryotic genomes (17).

18 Our assemblies of the X and the Y chromosomes are of high quality. In systems in which the  
19 X and Y are differentiated (with SNPs and indels) and using stringent mapping parameters,  
20 female/male sequence-depth ratio of  $\sim 1$ ,  $\sim 2$  and  $\sim 0$  for autosomes, X, and Y chromosomes,  
21 respectively, are expected, and were observed in our data (Figure 1A). A smaller set of  
22 experimentally validated sex-linked genes (compiled in Muyle et al. 2018) also mapped as  
23 expected to their previously assigned X or Y position (Figures 2 and 3). The X chromosome  
24 sequence obtained is 346 Mb long. The distribution of genes and repeats (in particular  
25 centromere- and telomere associated repeats) is also as expected for a typical metacentric  
26 chromosome (Figure 1A). Sex-specific recombination data and other data identified the  
27 pseudo-autosomal region (Figure 1B). The PAR is a small gene-rich region (25 Mb with  
28 1,286 genes). The Y chromosome assembly is 497 Mb long (522 Mb if the PAR is included)  
29 and includes some of the largest scaffolds (1 - 364.5 Mb, 12 - 45.7 Mb, 13 - 41.9 Mb).

30

### 31 **Evolution of the sex chromosomes**

32 The high-quality assembly of the X and Y chromosomes illuminates the evolution of  
33 recombination suppression between the sex chromosomes of *S. latifolia*. We found three  
34 evolutionary strata, and extensive rearrangements on the X, and especially the Y  
35 chromosome. Our analyses of rearrangements and estimates of synonymous site divergence  
36 ( $d_s$ ) between the X and Y copies used a set of 355 gametologs (= X/Y gene pairs) with 1:1  
37 orthology with the outgroup species *Silene conica* and *Silene vulgaris*. Change-point analysis  
38 identified four regions in the non-recombining region with different pairwise mean X-Y  $d_s$   
39 values in adjacent X chromosome regions, based on the gene order in the assembly (Figures  
40 2 and S4A). We defined three evolutionary strata, S1, S2 and S3, based on the different  $d_s$   
41 levels (Figures 2A and S4B). The oldest stratum, region S1, is split in two by S3. S3 has a  
42 lower  $d_s$  mean than its two flanking regions, which does not fit the expected pattern of  
43 decreasing divergence with proximity to the PAR; it has  $d_s$  value similar to that of the S2  
44 region but much higher synteny, and it was not formed via the same type of rearrangements  
45 (see below). S1 and S3 are small regions located within the first 27 Mb of the X chromosome  
46 q arm. S2, on the other hand, is very large and includes most of the X chromosome. Using a

1 molecular clock approach, we found that strata S2 and S3 evolved 4.9 [3.8, 6] and 4.4 [3.3,  
2 5.6] MY ago respectively and stratum S1 10.8 [9.7, 11.9] MY ago, i.e. when the *S. latifolia*  
3 sex chromosomes originated (18).

4 Comparisons of gene order between *S. latifolia* and two non-dioecious close relatives, *S.*  
5 *conica* and *S. vulgaris* revealed large syntenic blocks with some rearrangements (Figure S5).  
6 The *S. latifolia* Y chromosome stands out as highly rearranged compared with either the X or  
7 both outgroups, with the notable exception of the S3 stratum, which includes in particular a  
8 syntenic block of 4 Mb (Figure S6A and S6C). The *S. latifolia* X shows homology with four  
9 *S. vulgaris* scaffolds (1, 3, 6 and 16; Figures S5) and with chromosome 5 of *S. conica* (its  
10 closest relative), and smaller parts of chromosomes 1, 2 and 6 (Figures S5 and S6B).  
11 Reconstruction of the rearrangements between the X, the Y and the outgroups (Figures 2B,  
12 S6C-E and S7) showed that stratum S1 may have resulted from two inversions, one on the X  
13 encompassing S1a to S1b and one on the Y including S1c, that occurred early in the  
14 evolution of the sex chromosomes.

15 Stratum S3 had a lower  $d_s$  than stratum S1 and was the only region showing extended  
16 synteny between the X and Y chromosomes, which suggests that S3 has recently translocated  
17 into the middle of the oldest stratum S1 (Figure S6C). However, comparisons between *S.*  
18 *latifolia* X and the outgroups suggest that S3 was ancestrally located within the S1 stratum at  
19 the very same place (Figures 2 and S6D-E). To reconcile these findings, we propose that S3  
20 (initially within the S1 stratum) was lost from the Y and later regained by a recent  
21 duplicative-translocation from the X (Figure 2B). Stratum S2 is likely slightly older than S3  
22 as it is more rearranged, and probably arose through a different mechanism (Figure 2C).  
23 Reconstruction of the rearrangements between the X, the Y and the outgroups (Figures 2 and  
24 S8) could not associate S2 formation to a single event. We found several inversions, some of  
25 them pericentric, as previously speculated (19).

26 The Y and the X chromosomes are giant sized in *S. latifolia* and we infer that this is due to  
27 TE accumulation in both sex chromosomes. Our repeat analysis indeed revealed massive TE  
28 accumulation on the Y, but also, to a lesser extent, on the X (Tables 1 and S3, Figure 1). This  
29 explains why the X and Y, are, respectively, 4 and 5.5 times larger than a typical *S. conica*  
30 chromosome such as chromosome 5, with which most of the orthologs with the sex-linked  
31 genes are from. The *S. latifolia* autosomes average size is twice that of their *S. conica*  
32 homologs, supporting the view that TEs on sex chromosomes constitute a reservoir spreading  
33 genome-wide (20). In Eukaryotes, the non-recombining pericentromeric regions are TE-rich  
34 as recombination helps purge deleterious TE insertions (21) and this pericentromeric effect  
35 on the X chromosome is strikingly large (Figure S2B).

36 The Y chromosome exhibits signs of considerable degeneration. Out of 1,541 1:1 orthologs  
37 in *S. latifolia* X, *S. conica* and *S. vulgaris*, 963 had no detected ortholog on the Y  
38 chromosome. A model-based phylogenetic analysis of gene gain and loss confirmed this  
39 observation. As many as 58% of the genes on the Y appeared to have been lost since it  
40 stopped recombining with the X about ~11 MY ago. In addition, we detected more genes  
41 with premature stop codons on the Y compared to the X, except for stratum 3 (Figure 2E),  
42 suggesting the X might also be degenerating in this stratum. Among the gametologs with  
43 apparently functional X and Y copies, 77% of those with significant differences in rates of  
44 non-synonymous versus synonymous ( $d_N/d_S$ ) changes between X and Y had the Y copies  
45 with higher  $d_N/d_S$  values, indicating relaxed selection (Figure 2D). Another form of  
46 degeneration is when Y-linked genes have lower expression than their X counterparts, which

1 has been reported in *S. latifolia* (22-24); this may be explained by epigenetic modifications  
2 (Figure 2F-I), as Y genes had more TEs in their vicinity and bear hallmarks of silencing, i.e.,  
3 a higher number of 24 nucleotide small RNA mapping and higher levels of DNA  
4 methylation, especially around the promoter in the CHH context, compared to X genes (other  
5 contexts are shown in Figure S9). Using RAD-seq data, we found that the Y chromosome  
6 exhibits considerably lower genetic diversity *as compared to the X chromosome and*  
7 *autosomes* (Figure S10), in agreement with this chromosome undergoing genetic  
8 degeneration .

## 9 10 **The sex-determining genes on the Y chromosome**

11 We identified candidate sex-determining genes by sequencing at low coverage 18 mutants for  
12 sexual phenotypes (Table S4 and Material and Methods). Hermaphrodite mutants have  
13 deletions in the GSF region, asexual mutants in which anther development was stopped at  
14 early or intermediate stages in flower development have a deletions in the SPF region, and  
15 asexual mutants with pollen defects (late events) have deletions in the MFF region. SPF and  
16 MFF mutants were phenotypically very diverse, suggesting they have several different  
17 deleted genes (25,26).

18 Figure 3A shows the mapping of the mutant reads onto the reference Y chromosome along  
19 with reads from normal (U17) males and females, which indicate the expected coverage for  
20 presence (male) or absence (female) along the Y chromosome. Note that female coverage is  
21 generally low but not always null depending on how many X reads can mismatch on the Y  
22 chromosome. A region is inferred as deleted in a mutant if the coverage is similar (or lower)  
23 to the normal female and different from the normal male. While the data are noisy, regions of  
24 very low coverage in all mutants of a given category (but not other categories) are still easily  
25 identified and are limited in number (3 for GSF; 2 for SPF; 3 for MFF categories). They were  
26 located as expected on the Y based on a map of the Y built using genetic markers to genotype  
27 the mutants and locate their deletions (26). In particular, MFF deletions cluster near the PAR  
28 and Y4; GSF deletions are close to Slss, DD44, Cyp and Y6a; SPF deletions are close to  
29 Y6b.

30 One of the three GSF deletions includes *Clavata3* (*scaffold\_1\_000153*), the recently  
31 proposed GSF candidate gene (16). Differences in the balance of the *Clavata*-*Wuschel*  
32 pathway in males and females has been proposed to explain carpel formation/inhibition in  
33 female and male flowers as *Clavata3* (a carpel inhibitor) has a functional copy on the Y and a  
34 pseudogene on the X, while *Wuschel* (a carpel promoter) is present on the X and deleted  
35 from the Y (27). Consistent with this, both *Clavata3* and *Wuschel* are in stratum 1, as  
36 expected if both changed during the first step of sex-chromosome evolution, i.e., they support  
37 the model involving male-sterility and female-suppressing mutations (28). Figure 3B focuses  
38 on genes located in the deletions, combining information on coverage, gene expression  
39 during early or late flower development (Table S5) and functional annotation of sterility  
40 terms. We also considered genes that are absent in at least one mutant of a category, possibly  
41 explaining the observed phenotypic variability observed among the mutants. We found  
42 several MFF candidate genes. A notable MFF candidate is the gene *scaffold\_1\_000971* that  
43 encodes a cytochrome P450 protein and is homologous to the *Arabidopsis thaliana*  
44 *Cyp704B1* gene, which is crucial for pollen maturation, is expressed in the tapetum, and  
45 involved in the sporopollenin synthesis (a pollen cell wall component). Its inactivation causes

1 male-sterility in *A. thaliana*. This gene is expressed in stage 8 but not stage 5 in *S. latifolia*  
2 male flower development consistent with a MFF gene. Another MFF candidate gene is  
3 *scaffold\_1\_003352* that encodes for a papain-like cysteine protease also expressed in tapetum  
4 and important for pollen maturation, through involvement in proteolysis and tapetal cell  
5 degeneration). It is also annotated as a male-sterility gene. No clear SPF candidate was found  
6 and this region is not shown in Figure 3B. *scaffold\_1\_000971* is probably located in stratum  
7 1 while *scaffold\_1\_003352* is located in stratum 2. Our best MFF candidate is thus located in  
8 S1 as the best GSF one, which suggests that S1 might have formed when successive closely  
9 linked female-suppressing/male-enhancing mutations appeared during the evolution of  
10 dioecy (28).

11

## 12 **Conclusions**

13 We produced high-quality *S. latifolia* sex chromosome assemblies, which provided insights  
14 about their structure, function, and evolution. We found that the evolution of the *S. latifolia*  
15 sex chromosomes started ~11 MY ago with the differentiation of a small region including the  
16 GSF and MFF sex-determining genes. This first stratum probably formed by two paracentric  
17 inversions on both the X and the Y. More recently, another stratum including the centromere,  
18 S2, was formed ~5 MY ago. This generated a very large non-recombining region on the Y, in  
19 which a massive accumulation of TEs occurred, and from which they dispersed throughout  
20 the chromosome. These repeats and the lack of recombination probably allowed  
21 chromosomal rearrangements to occur on the Y. The absence of recombination also led to  
22 genetic degeneration, with as much as 58% of the genes on the X being lost from the Y.  
23 Interestingly, similar changes also affected the X chromosome, as its non-recombining  
24 pericentromeric region also expanded to a giant size via massive TE accumulation, which  
25 might have been driven by a reduced effective population size of the X chromosome (29,30).  
26



1  
2  
3  
4  
5  
6  
7  
8  
9  
10  
11  
12  
13  
14  
15  
16  
17  
18  
19  
20  
21  
22  
23  
24  
25  
26  
27  
28  
29  
30  
31  
32  
33  
34  
35  
36  
37  
38  
39  
40  
41  
42

## References and Notes

1. Charlesworth, D., Charlesworth, B., & Marais, G. (2005). Steps in the evolution of heteromorphic sex chromosomes. *Heredity*, 95(2), 118–128. <https://doi.org/10.1038/sj.hdy.6800697>
2. Bachtrog, D., Mank, J. E., Peichel, C. L., Kirkpatrick, M., Otto, S. P., Ashman, T. L., Hahn, M. W., Kitano, J., Mayrose, I., Ming, R., Perrin, N., Ross, L., Valenzuela, N., Vamosi, J. C., & Tree of Sex Consortium (2014). Sex determination: why so many ways of doing it? *PLoS biology*, 12(7), e1001899. <https://doi.org/10.1371/journal.pbio.1001899>
3. Reviewed in Ming, R., Bendahmane, A., & Renner, S. S. (2011). Sex chromosomes in land plants. *Annual review of plant biology*, 62, 485–514. <https://doi.org/10.1146/annurev-arplant-042110-103914>
4. Mahajan, S., Wei, K. H., Nalley, M. J., Gibilisco, L., & Bachtrog, D. (2018). De novo assembly of a young *Drosophila* Y chromosome using single-molecule sequencing and chromatin conformation capture. *PLoS biology*, 16(7), e2006348. <https://doi.org/10.1371/journal.pbio.2006348>
5. Reviewed by Muyle, A., Shearn, R., & Marais, G. A. (2017). The Evolution of Sex Chromosomes and Dosage Compensation in Plants. *Genome biology and evolution*, 9(3), 627–645. <https://doi.org/10.1093/gbe/evw282>
6. Reviewed by Renner, S. S., & Müller, N. A. (2021). Plant sex chromosomes defy evolutionary models of expanding recombination suppression and genetic degeneration. *Nature plants*, 7(4), 392–402. <https://doi.org/10.1038/s41477-021-00884-3>
7. Bernasconi, G., Antonovics, J., Biere, A., Charlesworth, D., Delph, L. F., Filatov, D., Giraud, T., Hood, M. E., Marais, G. A., McCauley, D., Pannell, J. R., Shykoff, J. A., Vyskot, B., Wolfe, L. M., & Widmer, A. (2009). *Silene* as a model system in ecology and evolution. *Heredity*, 103(1), 5–14. <https://doi.org/10.1038/hdy.2009.34>
8. Blackburn, K. B. (1923). Sex chromosomes in plants. *Nature*, 112(2819), 687-688. <https://doi.org/10.1038/112687c0>
9. Matsunaga, S., Hizume, M., Kawano, S., & Kuroiwa, T. (1994). Cytological analyses in *Melandrium album*: genome size, chromosome size and fluorescence in situ hybridization. *Cytologia*, 59(1), 135-141. <https://doi.org/10.1508/cytologia.59.135>
10. Qiu, S., Bergero, R., Guirao-Rico, S., Campos, J. L., Cezard, T., Gharbi, K., & Charlesworth, D. (2016). RAD mapping reveals an evolving, polymorphic and fuzzy boundary of a plant pseudoautosomal region. *Molecular ecology*, 25(1), 414–430. <https://doi.org/10.1111/mec.13297>
11. Nicolas, M., Marais, G., Hykelova, V., Janousek, B., Laporte, V., Vyskot, B., Mouchiroud, D., Negrutiu, I., Charlesworth, D., & Monéger, F. (2005). A gradual process of recombination restriction in the evolutionary history of the sex chromosomes in dioecious plants. *PLoS biology*, 3(1), e4. <https://doi.org/10.1371/journal.pbio.0030004>
12. Filatov D. A. (2005). Evolutionary history of *Silene latifolia* sex chromosomes revealed by genetic mapping of four genes. *Genetics*, 170(2), 975–979. <https://doi.org/10.1534/genetics.104.037069>

- 1 13. Hobza, R., Cegan, R., Jesionek, W., Kejnovsky, E., Vyskot, B., & Kubat, Z. (2017). Impact  
2 of Repetitive Elements on the Y Chromosome Formation in Plants. *Genes*, 8(11), 302.  
3 <https://doi.org/10.3390/genes8110302>
- 4 14. Westergaard, M. (1958). The mechanism of sex determination in dioecious flowering plants.  
5 *Advances in genetics*, 9, 217-281. [https://doi.org/10.1016/S0065-2660\(08\)60163-7](https://doi.org/10.1016/S0065-2660(08)60163-7)
- 6 15. The presence of these three factors was confirmed by Bergero, R., Charlesworth, D., Filatov,  
7 D. A., & Moore, R. C. (2008). Defining regions and rearrangements of the *Silene latifolia* Y  
8 chromosome. *Genetics*, 178(4), 2045–2053. <https://doi.org/10.1534/genetics.107.084566>
- 9 16. Kazama, Y., Kitoh, M., Kobayashi, T., Ishii, K., Krasovec, M., Yasui, Y., Abe, T., Kawano,  
10 S., & Filatov, D. A. (2022). A CLAVATA3-like Gene Acts as a Gynoecium Suppression  
11 Function in White Champion. *Molecular biology and evolution*, 39(10), msac195.  
12 <https://doi.org/10.1093/molbev/msac195>
- 13 17. Gaut, B. S., Wright, S. I., Rizzon, C., Dvorak, J., & Anderson, L. K. (2007). Recombination:  
14 an underappreciated factor in the evolution of plant genomes. *Nature reviews Genetics*, 8(1),  
15 77–84. <https://doi.org/10.1038/nrg1970>
- 16 18. Krasovec, M., Chester, M., Ridout, K., & Filatov, D. A. (2018). The Mutation Rate and the  
17 Age of the Sex Chromosomes in *Silene latifolia*. *Current biology*, 28(11), 1832–1838.e4.  
18 <https://doi.org/10.1016/j.cub.2018.04.069>
- 19 19. Bačovský, V., Čegan, R., Šimoníková, D., Hřibová, E., & Hobza, R. (2020). The Formation  
20 of Sex Chromosomes in *Silene latifolia* and *S. dioica* Was Accompanied by Multiple  
21 Chromosomal Rearrangements. *Frontiers in plant science*, 11, 205.  
22 <https://doi.org/10.3389/fpls.2020.00205>
- 23 20. Duhamel, M., Hood, M. E., Rodríguez de la Vega, R. C., Giraud, T. (2023). Dynamics of  
24 transposable element accumulation in the non-recombining regions of mating-type  
25 chromosomes in anther-smut fungi\* co-senior authors. *Nature Communications*, in press.
- 26 21. Charlesworth, B., Sniegowski, P., & Stephan, W. (1994). The evolutionary dynamics of  
27 repetitive DNA in eukaryotes. *Nature*, 371(6494), 215–220.  
28 <https://doi.org/10.1038/371215a0>
- 29 22. Chibalina, M. V., & Filatov, D. A. (2011). Plant Y chromosome degeneration is retarded by  
30 haploid purifying selection. *Current biology*, 21(17), 1475–1479.  
31 <https://doi.org/10.1016/j.cub.2011.07.045>
- 32 23. Bergero, R., & Charlesworth, D. (2011). Preservation of the Y transcriptome in a 10-million-  
33 year-old plant sex chromosome system. *Current biology*, 21(17), 1470–1474.  
34 <https://doi.org/10.1016/j.cub.2011.07.032>
- 35 24. Muyle, A., Zemp, N., Deschamps, C., Mousset, S., Widmer, A., & Marais, G. A. (2012).  
36 Rapid de novo evolution of X chromosome dosage compensation in *Silene latifolia*, a plant  
37 with young sex chromosomes. *PLoS biology*, 10(4), e1001308.  
38 <https://doi.org/10.1371/journal.pbio.1001308>
- 39 25. Zluvova, J., Georgiev, S., Janousek, B., Charlesworth, D., Vyskot, B., & Negrutiu, I. (2007).  
40 Early events in the evolution of the *Silene latifolia* Y chromosome: male specialization and  
41 recombination arrest. *Genetics*, 177(1), 375–386.  
42 <https://doi.org/10.1534/genetics.107.071175>

- 1 26. Bergero, R., Charlesworth, D., Filatov, D. A., & Moore, R. C. (2008). Defining regions and  
2 rearrangements of the *Silene latifolia* Y chromosome. *Genetics*, 178(4), 2045–2053.  
3 <https://doi.org/10.1534/genetics.107.084566>
- 4 27. Kazama, Y., Nishihara, K., Bergero, R., Fujiwara, M. T., Abe, T., Charlesworth, D., &  
5 Kawano, S. (2012). SIWUS1; an X-linked gene having no homologous Y-linked copy in  
6 *Silene latifolia*. *G3* (Bethesda, Md.), 2(10), 1269–1278.  
7 <https://doi.org/10.1534/g3.112.003749>
- 8 28. Charlesworth, B., & Charlesworth, D. (1978). A model for the evolution of dioecy and  
9 gynodioecy. *The American Naturalist*, 112(988), 975–997.
- 10 29. Wang, J., Na, J. K., Yu, Q., Gschwend, A. R., Han, J., Zeng, F., Aryal, R., VanBuren, R.,  
11 Murray, J. E., Zhang, W., Navajas-Pérez, R., Feltus, F. A., Lemke, C., Tong, E. J., Chen, C.,  
12 Wai, C. M., Singh, R., Wang, M. L., Min, X. J., Alam, M., ... Ming, R. (2012). Sequencing  
13 papaya X and Yh chromosomes reveals molecular basis of incipient sex chromosome  
14 evolution. *Proceedings of the National Academy of Sciences of the United States of America*,  
15 109(34), 13710–13715. <https://doi.org/10.1073/pnas.1207833109>
- 16 30. Bellott, D. W., Skaletsky, H., Cho, T. J., Brown, L., Locke, D., Chen, N., Galkina, S.,  
17 Pyntikova, T., Koutseva, N., Graves, T., Kremitzki, C., Warren, W. C., Clark, A. G.,  
18 Gaginskaya, E., Wilson, R. K., & Page, D. C. (2017). Avian W and mammalian Y  
19 chromosomes convergently retained dosage-sensitive regulators. *Nature genetics*, 49(3),  
20 387–394. <https://doi.org/10.1038/ng.3778>
- 21 31. Lebel-Hardenack, S., Hauser, E., Law, T. F., Schmid, J., & Grant, S. R. (2002). Mapping of  
22 sex determination loci on the white campion (*Silene latifolia*) Y chromosome using amplified  
23 fragment length polymorphism. *Genetics*, 160(2), 717–725.  
24 <https://doi.org/10.1093/genetics/160.2.717>
- 25 32. Zemp, N., Tavares, R., Muyle, A., Charlesworth, D., Marais, G. A., & Widmer, A. (2016).  
26 Evolution of sex-biased gene expression in a dioecious plant. *Nature plants*, 2(11), 16168.  
27 <https://doi.org/10.1038/nplants.2016.168>
- 28 33. Alberti, A., Poulain, J., Engelen, S., Labadie, K., Romac, S., Ferrera, I., Albin, G., Aury, J.  
29 M., Belser, C., Bertrand, A., Cruaud, C., Da Silva, C., Dossat, C., Gavory, F., Gas, S., Guy,  
30 J., Haquelle, M., Jacoby, E., Jaillon, O., Lemainque, A., ... Wincker, P. (2017). Viral to  
31 metazoan marine plankton nucleotide sequences from the Tara Oceans expedition. *Scientific*  
32 *data*, 4, 170093. <https://doi.org/10.1038/sdata.2017.93>
- 33 34. Engelen S, Aury JM. fastxtend. <https://www.genoscope.cns.fr/fastxtend>
- 34 35. Li, R., Li, Y., Kristiansen, K., & Wang, J. (2008). SOAP: short oligonucleotide alignment  
35 program. *Bioinformatics* (Oxford, England), 24(5), 713–714.  
36 <https://doi.org/10.1093/bioinformatics/btn025>
- 37 36. Bolger, A. M., Lohse, M., & Usadel, B. (2014). Trimmomatic: a flexible trimmer for  
38 Illumina sequence data. *Bioinformatics* (Oxford, England), 30(15), 2114–2120.  
39 <https://doi.org/10.1093/bioinformatics/btu170>
- 40 37. Papadopulos, A. S., Chester, M., Ridout, K., & Filatov, D. A. (2015). Rapid Y degeneration  
41 and dosage compensation in plant sex chromosomes. *Proceedings of the National Academy*  
42 *of Sciences of the United States of America*, 112(42), 13021–13026.  
43 <https://doi.org/10.1073/pnas.1508454112>

- 1 38. Langmead, B., & Salzberg, S. L. (2012). Fast gapped-read alignment with Bowtie 2. *Nature*  
2 *methods*, 9(4), 357–359. <https://doi.org/10.1038/nmeth.1923>
- 3 39. Li, H., Handsaker, B., Wysoker, A., Fennell, T., Ruan, J., Homer, N., Marth, G., Abecasis,  
4 G., Durbin, R., & 1000 Genome Project Data Processing Subgroup (2009). The Sequence  
5 Alignment/Map format and SAMtools. *Bioinformatics* (Oxford, England), 25(16), 2078–  
6 2079. <https://doi.org/10.1093/bioinformatics/btp352>
- 7 40. Koboldt, D. C., Chen, K., Wylie, T., Larson, D. E., McLellan, M. D., Mardis, E. R.,  
8 Weinstock, G. M., Wilson, R. K., & Ding, L. (2009). VarScan: variant detection in massively  
9 parallel sequencing of individual and pooled samples. *Bioinformatics* (Oxford, England),  
10 25(17), 2283–2285. <https://doi.org/10.1093/bioinformatics/btp373>
- 11 41. Rastas, P., Paulin, L., Hanski, I., Lehtonen, R., & Auvinen, P. (2013). Lep-MAP: fast and  
12 accurate linkage map construction for large SNP datasets. *Bioinformatics* (Oxford, England),  
13 29(24), 3128–3134. <https://doi.org/10.1093/bioinformatics/btt563>
- 14 42. Bergero, R., Qiu, S., Forrest, A., Borthwick, H., & Charlesworth, D. (2013). Expansion of  
15 the pseudo-autosomal region and ongoing recombination suppression in the *Silene latifolia*  
16 sex chromosomes. *Genetics*, 194(3), 673–686. <https://doi.org/10.1534/genetics.113.150755>
- 17 43. Kolmogorov, M., Yuan, J., Lin, Y., & Pevzner, P. A. (2019). Assembly of long, error-prone  
18 reads using repeat graphs. *Nature biotechnology*, 37(5), 540–546.  
19 <https://doi.org/10.1038/s41587-019-0072-8>
- 20 44. Walker, B. J., Abeel, T., Shea, T., Priest, M., Abouelliel, A., Sakthikumar, S., Cuomo, C. A.,  
21 Zeng, Q., Wortman, J., Young, S. K., & Earl, A. M. (2014). Pilon: an integrated tool for  
22 comprehensive microbial variant detection and genome assembly improvement. *PloS one*,  
23 9(11), e112963. <https://doi.org/10.1371/journal.pone.0112963>
- 24 45. Vaser, R., Sović, I., Nagarajan, N., & Šikić, M. (2017). Fast and accurate de novo genome  
25 assembly from long uncorrected reads. *Genome research*, 27(5), 737–746.  
26 <https://doi.org/10.1101/gr.214270.116>
- 27 46. Warren, R. L., Coombe, L., Mohamadi, H., Zhang, J., Jaquish, B., Isabel, N., Jones, S. J. M.,  
28 Bousquet, J., Bohlmann, J., & Birol, I. (2019). ntEdit: scalable genome sequence polishing.  
29 *Bioinformatics* (Oxford, England), 35(21), 4430–4432.  
30 <https://doi.org/10.1093/bioinformatics/btz400>
- 31 47. Manni, M., Berkeley, M. R., Seppey, M., Simão, F. A., & Zdobnov, E. M. (2021). BUSCO  
32 Update: Novel and Streamlined Workflows along with Broader and Deeper Phylogenetic  
33 Coverage for Scoring of Eukaryotic, Prokaryotic, and Viral Genomes. *Molecular biology and*  
34 *evolution*, 38(10), 4647–4654. <https://doi.org/10.1093/molbev/msab199>
- 35 48. Roach, M. J., Schmidt, S. A., & Borneman, A. R. (2018). Purge Haplotigs: allelic contig  
36 reassignment for third-gen diploid genome assemblies. *BMC bioinformatics*, 19(1), 460.  
37 <https://doi.org/10.1186/s12859-018-2485-7>
- 38 49. Istace, B., Belser, C., & Aury, J. M. (2020). BiSCoT: improving large eukaryotic genome  
39 assemblies with optical maps. *PeerJ*, 8, e10150. <https://doi.org/10.7717/peerj.10150>
- 40 50. Aury, J. M., & Istace, B. (2021). Hapo-G, haplotype-aware polishing of genome assemblies  
41 with accurate reads. *NAR genomics and bioinformatics*, 3(2), lqab034.  
42 <https://doi.org/10.1093/nargab/lqab034>

- 1 51. Ghurye, J., Pop, M., Koren, S., Bickhart, D., & Chin, C. S. (2017). Scaffolding of long read  
2 assemblies using long range contact information. *BMC genomics*, 18(1), 527.  
3 <https://doi.org/10.1186/s12864-017-3879-z>
- 4 52. Tang, H., Zhang, X., Miao, C., Zhang, J., Ming, R., Schnable, J. C., Schnable, P. S., Lyons,  
5 E., & Lu, J. (2015). ALLMAPS: robust scaffold ordering based on multiple maps. *Genome*  
6 *biology*, 16(1), 3. <https://doi.org/10.1186/s13059-014-0573-1>
- 7 53. Brůna, T., Hoff, K. J., Lomsadze, A., Stanke, M., & Borodovsky, M. (2021). BRAKER2:  
8 automatic eukaryotic genome annotation with GeneMark-EP+ and AUGUSTUS supported  
9 by a protein database. *NAR genomics and bioinformatics*, 3(1), lqaa108.  
10 <https://doi.org/10.1093/nargab/lqaa108>
- 11 54. Stiehler, F., Steinborn, M., Scholz, S., Dey, D., Weber, A. P. M., & Denton, A. K. (2021).  
12 Helixer: cross-species gene annotation of large eukaryotic genomes using deep learning.  
13 *Bioinformatics* (Oxford, England), 36(22-23), 5291–5298.  
14 <https://doi.org/10.1093/bioinformatics/btaa1044>
- 15 55. Tarailo-Graovac, M., & Chen, N. (2009). Using RepeatMasker to identify repetitive elements  
16 in genomic sequences. *Current protocols in bioinformatics*, Chapter 4, 4.10.1–4.10.14.  
17 <https://doi.org/10.1002/0471250953.bi0410s25>
- 18 56. Flynn, J. M., Hubley, R., Goubert, C., Rosen, J., Clark, A. G., Feschotte, C., & Smit, A. F.  
19 (2020). RepeatModeler2 for automated genomic discovery of transposable element families.  
20 *Proceedings of the National Academy of Sciences of the United States of America*, 117(17),  
21 9451–9457. <https://doi.org/10.1073/pnas.1921046117>
- 22 57. Chen, S. (2023). Ultrafast one-pass FASTQ data preprocessing, quality control, and  
23 deduplication using fastp. iMeta, e107. <https://doi.org/10.1002/imt2.107>
- 24 58. Wu, T. D., Reeder, J., Lawrence, M., Becker, G., & Brauer, M. J. (2016). GMAP and  
25 GSNAP for Genomic Sequence Alignment: Enhancements to Speed, Accuracy, and  
26 Functionality. *Methods in molecular biology* (Clifton, N.J.), 1418, 283–334.  
27 [https://doi.org/10.1007/978-1-4939-3578-9\\_15](https://doi.org/10.1007/978-1-4939-3578-9_15)
- 28 59. Stanke, M., Keller, O., Gunduz, I., Hayes, A., Waack, S., & Morgenstern, B. (2006).  
29 AUGUSTUS: ab initio prediction of alternative transcripts. *Nucleic acids research*, 34(Web  
30 Server issue), W435–W439. <https://doi.org/10.1093/nar/gkl200>
- 31 60. Buchfink, B., Xie, C., & Huson, D. H. (2015). Fast and sensitive protein alignment using  
32 DIAMOND. *Nature methods*, 12(1), 59–60. <https://doi.org/10.1038/nmeth.3176>
- 33 61. Törönen, P., Medlar, A., & Holm, L. (2018). PANNZER2: a rapid functional annotation web  
34 server. *Nucleic acids research*, 46(W1), W84–W88. <https://doi.org/10.1093/nar/gky350>
- 35 62. Ou, S., Su, W., Liao, Y., Chougule, K., Agda, J. R. A., Hellinga, A. J., Lugo, C. S. B., Elliott,  
36 T. A., Ware, D., Peterson, T., Jiang, N., Hirsch, C. N., & Hufford, M. B. (2019).  
37 Benchmarking transposable element annotation methods for creation of a streamlined,  
38 comprehensive pipeline. *Genome biology*, 20(1), 275. <https://doi.org/10.1186/s13059-019-1905-y>  
39
- 40 63. Cermak, T., Kubat, Z., Hobza, R., Koblizkova, A., Widmer, A., Macas, J., Vyskot, B., &  
41 Kejnovsky, E. (2008). Survey of repetitive sequences in *Silene latifolia* with respect to their

- 1 distribution on sex chromosomes. *Chromosome research*, 16(7), 961–976.  
2 <https://doi.org/10.1007/s10577-008-1254-2>
- 3 64. Macas, J., Kejnovský, E., Neumann, P., Novák, P., Koblížková, A., & Vyskot, B. (2011).  
4 Next generation sequencing-based analysis of repetitive DNA in the model dioecious  
5 [corrected] plant *Silene latifolia*. *PloS one*, 6(11), e27335.  
6 <https://doi.org/10.1371/journal.pone.0027335>
- 7 65. Fields, P. D., Weber, M. M., Waneka, G., Broz, A. K., & Sloan, D. B. (2023). Chromosome-  
8 level genome assembly for the angiosperm *Silene conica*. *bioRxiv*, 2023-09.  
9 <https://doi.org/10.1101/2023.09.05.556365>
- 10 66. Emms, D. M., & Kelly, S. (2019). OrthoFinder: phylogenetic orthology inference for  
11 comparative genomics. *Genome biology*, 20(1), 238. [https://doi.org/10.1186/s13059-019-](https://doi.org/10.1186/s13059-019-1832-y)  
12 [1832-y](https://doi.org/10.1186/s13059-019-1832-y)
- 13 67. Camacho, C., Coulouris, G., Avagyan, V., Ma, N., Papadopoulos, J., Bealer, K., & Madden,  
14 T. L. (2009). BLAST+: architecture and applications. *BMC bioinformatics*, 10, 421.  
15 <https://doi.org/10.1186/1471-2105-10-421>
- 16 68. Yang Z. (2007). PAML 4: phylogenetic analysis by maximum likelihood. *Molecular biology*  
17 *and evolution*, 24(8), 1586–1591. <https://doi.org/10.1093/molbev/msm088>
- 18 69. Abascal, F., Zardoya, R., & Telford, M. J. (2010). TranslatorX: multiple alignment of  
19 nucleotide sequences guided by amino acid translations. *Nucleic acids research*, 38(Web  
20 Server issue), W7–W13. <https://doi.org/10.1093/nar/gkq291>
- 21 70. Edgar R. C. (2004). MUSCLE: multiple sequence alignment with high accuracy and high  
22 throughput. *Nucleic acids research*, 32(5), 1792–1797. <https://doi.org/10.1093/nar/gkh340>
- 23 71. Lindeløv, J. K. (2020, January 5). mcp: An R Package for Regression With Multiple Change  
24 Points. <https://doi.org/10.31219/osf.io/fzqxv>
- 25 72. Richards, C. M., Emery, S. N., & McCauley, D. E. (2003). Genetic and demographic  
26 dynamics of small populations of *Silene latifolia*. *Heredity*, 90(2), 181–186.  
27 <https://doi.org/10.1038/sj.hdy.6800214>
- 28 73. Ranwez, V., Douzery, E. J. P., Cambon, C., Chantret, N., & Delsuc, F. (2018). MACSE v2:  
29 Toolkit for the Alignment of Coding Sequences Accounting for Frameshifts and Stop  
30 Codons. *Molecular biology and evolution*, 35(10), 2582–2584.  
31 <https://doi.org/10.1093/molbev/msy159>
- 32 74. Following Marais, G. A., Nicolas, M., Bergero, R., Chambrier, P., Kejnovsky, E., Monéger,  
33 F., Hobza, R., Widmer, A., & Charlesworth, D. (2008). Evidence for degeneration of the Y  
34 chromosome in the dioecious plant *Silene latifolia*. *Current biology*, 18(7), 545–549.  
35 <https://doi.org/10.1016/j.cub.2008.03.023>
- 36 75. Álvarez-Carretero, S., Kapli, P., & Yang, Z. (2023). Beginner's Guide on the Use of PAML  
37 to Detect Positive Selection. *Molecular biology and evolution*, 40(4), msad041.  
38 <https://doi.org/10.1093/molbev/msad041>
- 39 76. Mendes, F. K., Vanderpool, D., Fulton, B., & Hahn, M. W. (2021). CAFE 5 models variation  
40 in evolutionary rates among gene families. *Bioinformatics* (Oxford, England), 36(22-23),  
41 5516–5518. <https://doi.org/10.1093/bioinformatics/btaa1022>

- 1 77. Kozlov, A. M., Darriba, D., Flouri, T., Morel, B., & Stamatakis, A. (2019). RAxML-NG: a  
2 fast, scalable and user-friendly tool for maximum likelihood phylogenetic inference.  
3 *Bioinformatics* (Oxford, England), 35(21), 4453–4455.  
4 <https://doi.org/10.1093/bioinformatics/btz305>
- 5 78. Kumar, S., Suleski, M., Craig, J. M., Kasprówicz, A. E., Sanderford, M., Li, M., Stecher, G.,  
6 & Hedges, S. B. (2022). TimeTree 5: An Expanded Resource for Species Divergence Times.  
7 *Molecular biology and evolution*, 39(8), msac174. Advance online publication.  
8 <https://doi.org/10.1093/molbev/msac174>
- 9 79. Li H. (2018). Minimap2: pairwise alignment for nucleotide sequences. *Bioinformatics*  
10 (Oxford, England), 34(18), 3094–3100. <https://doi.org/10.1093/bioinformatics/bty191>
- 11 80. Lovell, J. T., Sreedasyam, A., Schranz, M. E., Wilson, M., Carlson, J. W., Harkess, A.,  
12 Emms, D., Goodstein, D. M., & Schmutz, J. (2022). GENESPACE tracks regions of interest  
13 and gene copy number variation across multiple genomes. *eLife*, 11, e78526.  
14 <https://doi.org/10.7554/eLife.78526>
- 15 81. Larget, B., Kadane, J. B., & Simon, D. L. (2005). A Bayesian approach to the estimation of  
16 ancestral genome arrangements. *Molecular phylogenetics and evolution*, 36(2), 214–223.  
17 <https://doi.org/10.1016/j.ympev.2005.03.026>
- 18 82. Miklós, I., & Tannier, E. (2010). Bayesian sampling of genomic rearrangement scenarios via  
19 double cut and join. *Bioinformatics* (Oxford, England), 26(24), 3012–3019.  
20 <https://doi.org/10.1093/bioinformatics/btq574>
- 21 83. Liu, X., Glémin, S., & Karrenberg, S. (2020). Evolution of putative barrier loci at an  
22 intermediate stage of speciation with gene flow in campions (*Silene*). *Molecular ecology*,  
23 29(18), 3511–3525. <https://doi.org/10.1111/mec.15571>
- 24 84. Rochette, N. C., Rivera-Colón, A. G., & Catchen, J. M. (2019). Stacks 2: Analytical methods  
25 for paired-end sequencing improve RADseq-based population genomics. *Molecular ecology*,  
26 28(21), 4737–4754. <https://doi.org/10.1111/mec.15253>
- 27 85. Li, H. (2013). Aligning sequence reads, clone sequences and assembly contigs with BWA-  
28 MEM. *arXiv preprint arXiv:1303.3997*. <https://doi.org/10.48550/arXiv.1303.3997>
- 29 86. Garrison, E., & Marth, G. (2012). Haplotype-based variant detection from short-read  
30 sequencing. *arXiv preprint arXiv:1207.3907*. <https://doi.org/10.48550/arXiv.1207.3907>
- 31 87. O'Leary, S. J., Puritz, J. B., Willis, S. C., Hollenbeck, C. M., & Portnoy, D. S. (2018). These  
32 aren't the loci you'e looking for: Principles of effective SNP filtering for molecular  
33 ecologists. *Molecular ecology*, 10.1111/mec.14792. Advance online publication.  
34 <https://doi.org/10.1111/mec.14792>
- 35 88. Korunes, K. L., & Samuk, K. (2021). pixy: Unbiased estimation of nucleotide diversity and  
36 divergence in the presence of missing data. *Molecular ecology resources*, 21(4), 1359–1368.  
37 <https://doi.org/10.1111/1755-0998.13326>
- 38 89. Andrews, S. (2010). FastQC: A Quality Control Tool for High Throughput Sequence Data.  
39 Available online at: <http://www.bioinformatics.babraham.ac.uk/projects/fastqc/>
- 40 90. Martin, M. (2011). Cutadapt removes adapter sequences from high-throughput sequencing  
41 reads. *EMBnet journal*, 17(1), 10-12. <https://doi.org/10.14806/ej.17.1.200>

- 1 91. Shahid, S., & Axtell, M. J. (2014). Identification and annotation of small RNA genes using  
2 ShortStack. *Methods* (San Diego, Calif.), 67(1), 20–27.  
3 <https://doi.org/10.1016/j.ymeth.2013.10.004>
- 4 92. Johnson, N. R., Yeoh, J. M., Coruh, C., & Axtell, M. J. (2016). Improved Placement of  
5 Multi-mapping Small RNAs. *G3* (Bethesda, Md.), 6(7), 2103–2111.  
6 <https://doi.org/10.1534/g3.116.030452>
- 7 93. Quinlan, A. R., & Hall, I. M. (2010). BEDTools: a flexible suite of utilities for comparing  
8 genomic features. *Bioinformatics* (Oxford, England), 26(6), 841–842.  
9 <https://doi.org/10.1093/bioinformatics/btq033>
- 10 94. Krueger, F. (2015). Trim Galore!: A wrapper around Cutadapt and FastQC to consistently  
11 apply adapter and quality trimming to FastQ files, with extra functionality for RRBS data.  
12 Babraham Institute.
- 13 95. Krueger, F., & Andrews, S. R. (2011). Bismark: a flexible aligner and methylation caller for  
14 Bisulfite-Seq applications. *Bioinformatics* (Oxford, England), 27(11), 1571–1572.  
15 <https://doi.org/10.1093/bioinformatics/btr167>
- 16 96. Bray, N. L., Pimentel, H., Melsted, P., & Pachter, L. (2016). Near-optimal probabilistic  
17 RNA-seq quantification. *Nature biotechnology*, 34(5), 525–527.  
18 <https://doi.org/10.1038/nbt.3519>
- 19 97. Musich, R., Cadle-Davidson, L., & Osier, M. V. (2021). Comparison of Short-Read  
20 Sequence Aligners Indicates Strengths and Weaknesses for Biologists to Consider. *Frontiers*  
21 *in plant science*, 12, 657240. <https://doi.org/10.3389/fpls.2021.657240>
- 22 98. Zluvova, J., Nicolas, M., Berger, A., Negrutiu, I., & Monéger, F. (2006). Premature arrest of  
23 the male flower meristem precedes sexual dimorphism in the dioecious plant *Silene latifolia*.  
24 *Proceedings of the National Academy of Sciences of the United States of America*, 103(49),  
25 18854–18859. <https://doi.org/10.1073/pnas.0606622103>
- 26 99. Dobin, A., Davis, C. A., Schlesinger, F., Drenkow, J., Zaleski, C., Jha, S., Batut, P.,  
27 Chaisson, M., & Gingeras, T. R. (2013). STAR: ultrafast universal RNA-seq aligner.  
28 *Bioinformatics* (Oxford, England), 29(1), 15–21.  
29 <https://doi.org/10.1093/bioinformatics/bts635>
- 30 100. Liao, Y., Smyth, G. K., & Shi, W. (2014). featureCounts: an efficient general purpose  
31 program for assigning sequence reads to genomic features. *Bioinformatics* (Oxford,  
32 England), 30(7), 923–930. <https://doi.org/10.1093/bioinformatics/btt656>
- 33 101. Love, M. I., Huber, W., & Anders, S. (2014). Moderated estimation of fold change and  
34 dispersion for RNA-seq data with DESeq2. *Genome biology*, 15(12), 550.  
35 <https://doi.org/10.1186/s13059-014-0550-8>
- 36 102. Wu, T., Hu, E., Xu, S., Chen, M., Guo, P., Dai, Z., Feng, T., Zhou, L., Tang, W., Zhan,  
37 L., Fu, X., Liu, S., Bo, X., & Yu, G. (2021). clusterProfiler 4.0: A universal enrichment tool  
38 for interpreting omics data. *Innovation* (Cambridge (Mass.)), 2(3), 100141.  
39 <https://doi.org/10.1016/j.xinn.2021.100141>

40

41 **Acknowledgments:** We thank Elise Lacroix technician at Univ. Lyon 1 glasshouse for her help  
42 for growing the *S. latifolia* U17 plants.



1       **Funding:**

2           Agence Nationale de la Recherche (ANR) grant ANR-20-CE20-0015-01 (GABM, ABe).

3           Fédération de Recherche “Biodiversité, Eau, Environnement, Ville & Santé” (FR  
4           BIOENVIS) of University of Lyon 1 grant (GABM, JB)

5           The Czech Science Foundation grants 21-00580S and 22-00364S (PJ)

6

7       **Author contributions:**

8           Conceptualization: GABM, RH, AMa, ADG, ABe, TG, DC, AMu

9           Formal analysis: CM, CB, QR, PV, PJ, AMu, MH, ET, XL, EMG, CL, PDF, CBe, RCe,  
10          RRV, GA, AEF, VM, AV, SK, ADG, AMa

11          Methodology: CM, CB, RL, ADG, GABM

12          Investigation: CM, CB, QR, PV, PJ, AMu, MH, ET, XL, EMG, CL, PDF, CC, KL, CBe,  
13          JB, SS, RCe, RL, RRV, GA, ABo, RT, DBS, SK, LFD, DC, TG, ABe, ADG, AMa, RH,  
14          GABM

15          Resources: RH, ADG, LFD, DBS, MSO, DRT, OAJA, MK, HS, HSi, PC, ZT, HT, LW,  
16          SD, BS, DP AMu

17          Software: CM, CB, ET, RL, RRV, AV, ADG

18          Validation: AC, RCo, CF

19          Visualization: CM, CB, QR, PV, AMu, ET, RL, RRV, DP, SK, AMa,

20          Funding acquisition: GABM, ABe

21          Project administration: GABM

22          Supervision: GABM, RH, AMa, ADG, ABe, TG, LFD, SK, DBS, RCo, RT, ABo, RRV,  
23          RL, AMu

24          Writing – original draft: GABM, AMa, ABe, SK, DBS, SS, JB, PDF, XL, ET, AMa, QR,  
25          CB, CM

26          Writing – review & editing: GABM, TG, DC, LFD, SK, ABo, RRV, AMu, PV

27       **Competing interests:** Authors declare that they have no competing interests

28       **Data and materials availability:** All data will be available on NCBI and codes on github.

29       **Supplementary Materials**

30       Materials and Methods

31       Figs. S1 to S11

32       Tables S1 to S5

33       References (31–102)

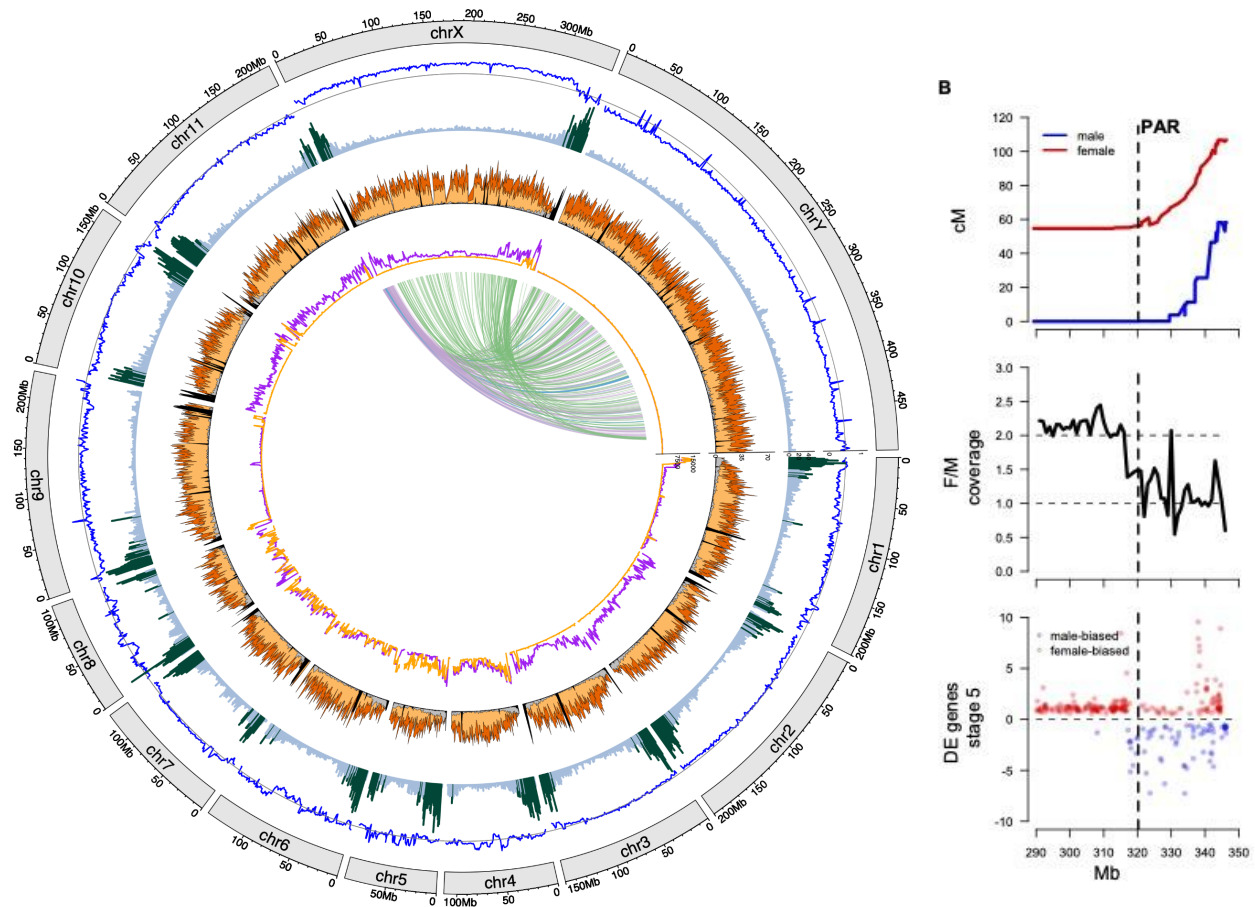

1  
2 **Fig. 1. View of the assembly of the *S. latifolia* male genome assembly.** (A) Circos plot of the *S.*  
3 *latifolia* male genome. Circles included in the Circos plot are from outer to inner circles: 1. The  
4 coverage Female/Male ratio distribution. 2. Gene density highlights the most populated regions  
5 (dark green); they are defined as those with a density larger than the average plus 1 sd. 3. Family  
6 repeats density distribution showing satellite elements (black), LTR elements: Ty3/Gypsy  
7 (orange), Ty1/Copia (yellow), LINE (violet), and Helitron (grey). 4. SNP Female and male  
8 distribution (purple for female and orange for male). This analysis is consistent with the sequenced  
9 male being highly homozygous, although some chromosomes show heterozygosity. It is also  
10 consistent with the female being a sister of the male. 5. Rearrangements between X and Y  
11 chromosomes based on the gametologs. (B) Zoom in on the X chromosome showing  
12 recombination in males (blue) and females (red) defining the pseudo-autosomal boundary at 321  
13 Mb, female/male sequence coverage ratio, and significant differential expression between male  
14 and female flowers (stage 5); the full analysis of differential gene expression is shown in Figure  
15 S11. All panels have data summarised in 1Mb windows.  
16

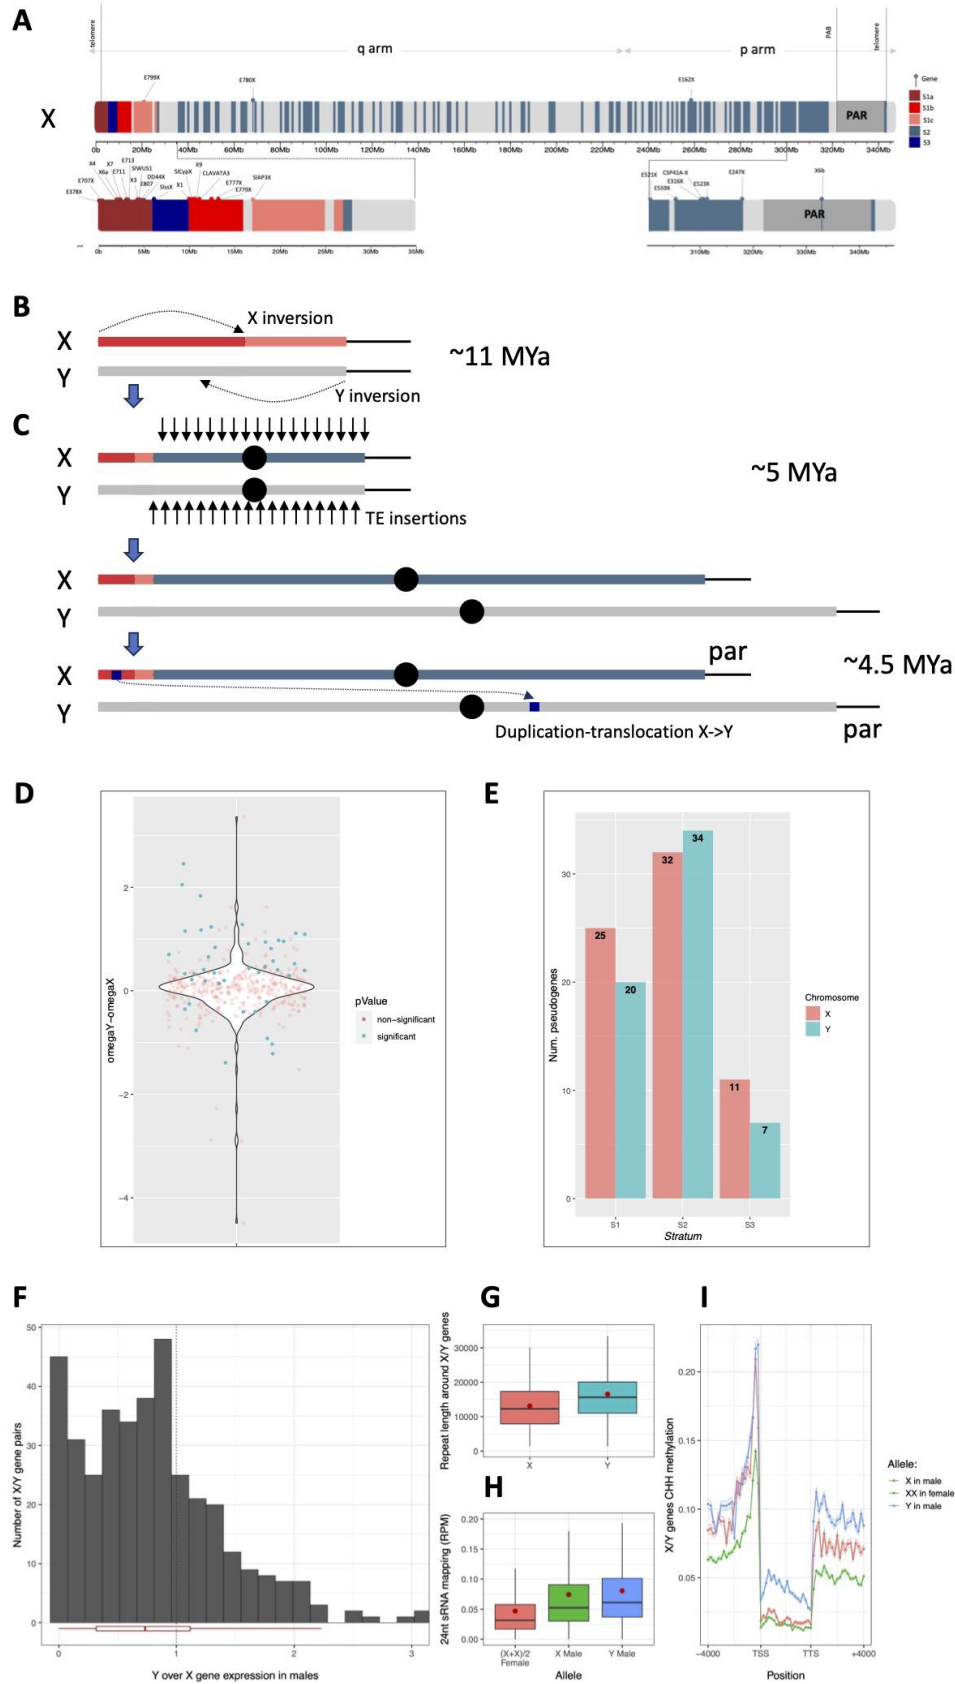

1

1 **Fig. 2. The evolution of the sex chromosomes.** (A) The X chromosome sequence. The 417  
2 gametologs genes are placed and colored according to their evolutionary stratum (S1a, S1b, S1c,  
3 S2 and S3). Zoom in of the extremities of the X chromosome are also shown. Genes previously  
4 characterized in the literature are identified by a ball-headed pin colored according to their  
5 stratum and located over the X chromosome sequence. (B) Schematic view of the first step of the  
6 evolution of the sex chromosomes with a zoom in on the first 35 Mb of the p arm of the X  
7 chromosome. The formation of stratum 1 (from S1a to S1c) is shown. Strata are not represented  
8 on the Y. (C) Global view of the other steps of the evolution of the sex chromosomes (full  
9 chromosomes are shown). (D) Violin plot of dN/dS differences among X and Y copies,  
10 gametologs pairs with significant differences (p-value < 0.05) are shown in blue. (E) Genes with  
11 premature stop codons on the sex chromosomes shown by strata. (F) Distribution of Y over X  
12 gene expression ratio in four *S. latifolia* males in flower buds. The boxplots below the  
13 distribution represent the median, the first and third quartiles (hinges) and 1.5 times the distance  
14 between the first and third quartiles (whiskers). (G) Sum of repeat lengths around X/Y gene  
15 pairs, from 4000 bp upstream to 4000 bp downstream of the gene. If repeats went beyond the  
16 borders (+/- 4000bp), their length was not included. (H) Mapping of 24nt small RNA (in reads  
17 per million mapped reads, abbreviated RPM) on X/Y gene pairs for three *S. latifolia* females and  
18 three males in flower buds and leaves. The boxplots represent the median, the first and third  
19 quartiles (hinges) and 1.5 times the distance between the first and third quartiles (whiskers). The  
20 red dot stands for the mean. Both X alleles in females are represented in red and their sRNA  
21 mapping was divided by two for stoichiometric comparison to the X allele in males (represented  
22 in green) and the Y allele in males (represented in blue). (I) Plot of X/Y genes DNA methylation  
23 in CHH context. Both X alleles in the female are represented in red, the X allele in the male in  
24 green and the Y allele in the male in blue. All X/Y genes were combined to plot the average  
25 proportion of methylated reads at cytosine positions along sliding windows; the 95% confidence  
26 interval is represented as a small ribbon around the curve. Twenty windows of 200 bp were  
27 studied upstream of the transcription start site (TSS) and twenty windows of 200 bp were studied  
28 downstream of the transcription termination site (TTS). The gene body (from TSS to TTS) was  
29 divided into twenty windows of equal size.

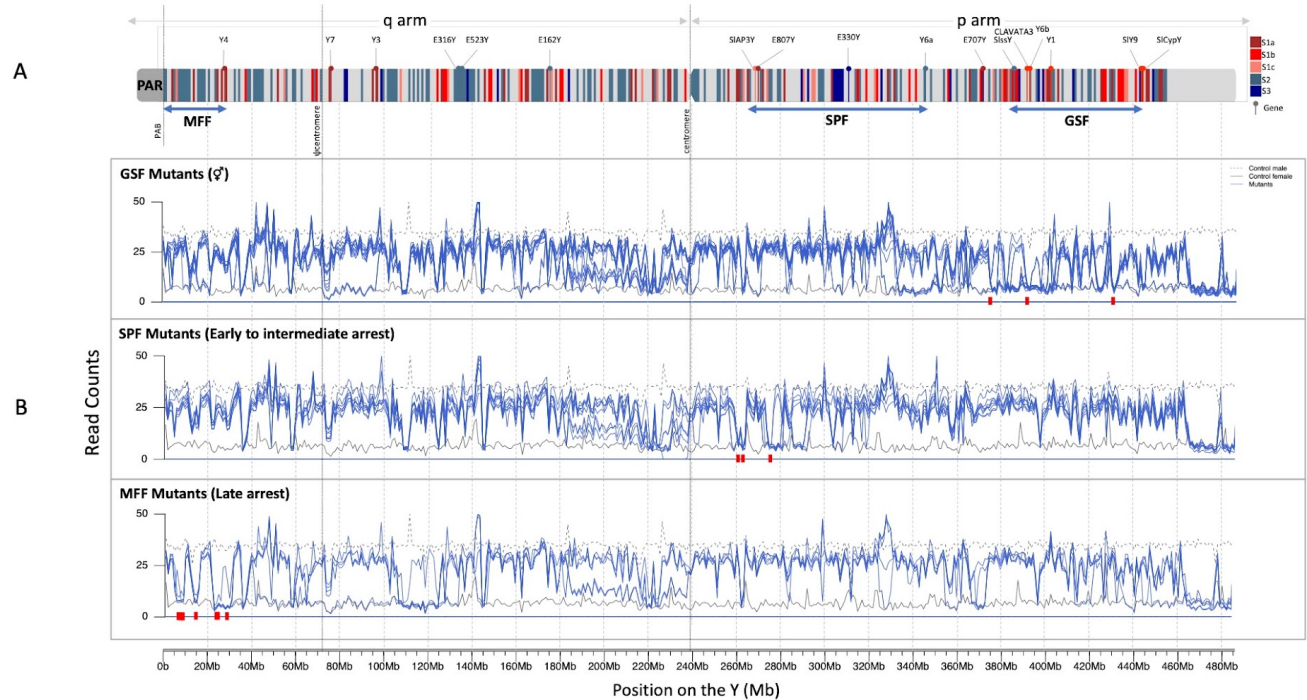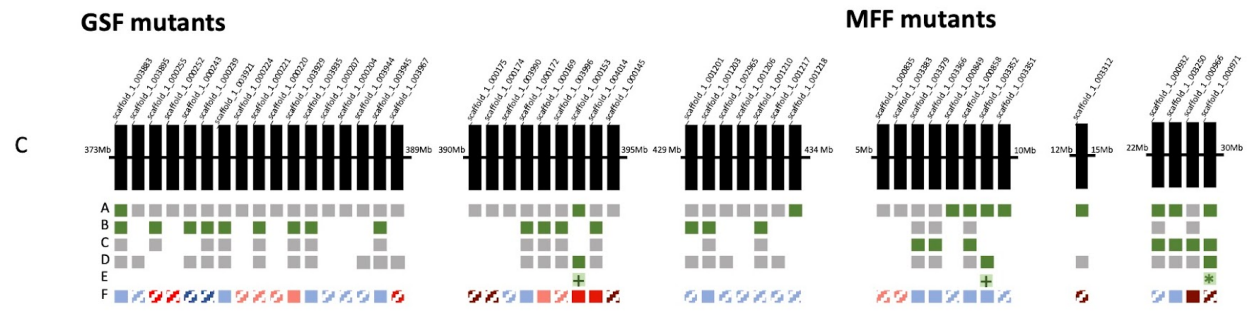

1

2 **Fig. 3. Y deletion mutants analysis.** (A) The Y chromosome sequence and its putative sex-  
 3 determining regions (MFF, SPF, and GSF) with estimated location from Bergero et al. (2008).  
 4 The 417 gametologs genes are placed and colored according to their evolutionary stratum (S1a,  
 5 S1b, S1c, S2 and S3). Additionally, genes previously characterized in the literature are identified  
 6 by a ball-headed pin colored according to their stratum and located over the Y chromosome  
 7 sequence. (B) Each plot shows the read count of all individuals (blue) grouped by mutant's  
 8 phenotypic category (from top to bottom: GSF mutants, SPF mutants, and MFF mutants) after  
 9 mapping their reads onto the reference Y chromosome. The read count of the female and male  
 10 control are also present in the plot (solid and dashed black line, respectively) and coincide with  
 11 the maximum and the minimum (male and female values, respectively) read count of the  
 12 mutants. Red rectangles depict genes that are deleted in all mutants of a given phenotypic  
 13 category and present in all the remaining mutants (i.e., phenotype-specific deleted genes): 3 in  
 14 GSF mutants at 370–440Mb, 3 in SPF mutants at 260Mb–280Mb and 8 in MFF mutants at 5Mb–  
 15 30Mb. The maximum number of reads was set to 50. Window size=1Mb. (C) Phenotype-specific  
 16 deleted genes and their neighbor genes with a relevant presence/absence pattern within the low  
 17 covered regions in the GSF and MFF mutants' phenotypic category: row A concerns the

1 presence/absence of the gene among mutants, in which green is for phenotype-specific deleted  
2 genes and gray is for genes deleted in at least one mutant of the category of interest and present  
3 in all the remaining mutants; row B and C concern the expression of each gene in a normal male  
4 at stage 5 and 8 of development, respectively: green is for genes expressed in the stage expected  
5 for sex determining genes (stage 5 for GSF genes or stage 8 for MFF genes), gray is for genes  
6 that do not follow the expected pattern of expression in sex determining genes, and blank means  
7 the gene is not expressed in any of the stages; row D concerns the functional annotation of each  
8 gene: green is for genes annotated with a sex determining function, gray is for genes annotated  
9 with no clear sex determining function, and blank is for genes without available functional  
10 annotation; row E regards they possible role as a sex determining gene, in which we highlight  
11 with asterisk (\*) a very good candidate to sex-determining gene and with a plus signal (+) good  
12 candidates to sex-determining genes; row F indicates the stratum of each gene: brown for S1a,  
13 red for S1b, pink for S1c, light blue for S3 (for the genes with striped squares the stratum was  
14 inferred from the closest genes).  
15

1 **Table 1. Statistics for the genome and the sex chromosomes.** All assembly metrics were  
 2 computed by the total assembly and sex chromosomes.

3

|                                                  | <b>Whole genome</b> | <b>X chromosome</b> | <b>Y chromosome</b> |
|--------------------------------------------------|---------------------|---------------------|---------------------|
| Total assembled size (bp)                        | 2,739,705,433       | 346,484,273         | 497,814,031         |
| Number of contigs                                | 1553                | 55                  | 29                  |
| Number of scaffolds                              | 929                 | 21                  | 4                   |
| N50 (bp)                                         | 100,527,128         | 50,520,191          | 364,495,762         |
| N90 (bp)                                         | 24,182,774          | 21,428,974          | 364,495,762         |
| Largest length size (bp)                         | 364,495,762         | 133,616,578         | 364,495,762         |
| Anchored of the total sequences (anchoring rate) | 2,586,997,243 (95%) |                     |                     |
| Annotated protein-coding genes                   | 35,436              | 3,520               | 2,344               |
| Mean gene length (bp)                            | 4,155               | 4,332               | 4,045               |
| BUSCO score                                      | 86.5%               |                     |                     |
| Identified repeats                               | 79.24%              | 77.75%              | 81.38%              |
| Annotated repeats                                | 61.18%              | 58%                 | 65%                 |
| LTR retrotransposons                             | 54.42%              | 52.7%               | 60.55%              |
| DNA transposons                                  | 4.11%               | 3.11%               | 3.22%               |
| MITE                                             | 0.14%               | 0.098%              | 0.068%              |
| LINE                                             | 0.48%               | 0.37%               | 0.55%               |
| Satellite repeats                                | 2.04%               | 2.014%              | 1.18%               |

4
